# Supplementary material for: A Role in Immunity for Arabidopsis Cysteine Protease RD21, the Ortholog of the Tomato Immune Protease C14
Source: PLOS journal article supplement (doi:10.1371/journal.pone.0029317), 2012-01-06
Supplement: S1 (10.1371/journal.pone.0029317.s001) [file journal.pone.0029317.s001]

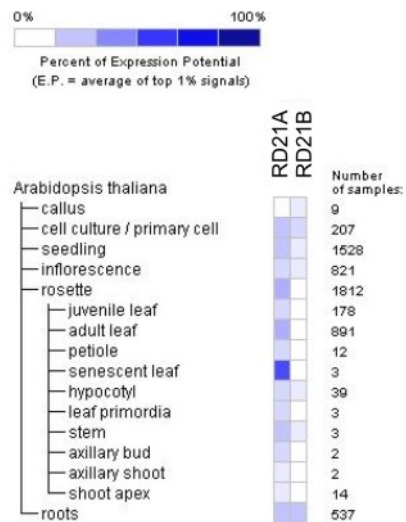

**Figure S1.** Expression of *RD21A* and *RD21B* during Arabidopsis development. Data were extracted from Genevestigator.
