# Supplementary material for: A Role in Immunity for Arabidopsis Cysteine Protease RD21, the Ortholog of the Tomato Immune Protease C14
Source: PLOS journal article supplement (doi:10.1371/journal.pone.0029317), 2012-01-06
Supplement: S8 (10.1371/journal.pone.0029317.s008) [file journal.pone.0029317.s008]

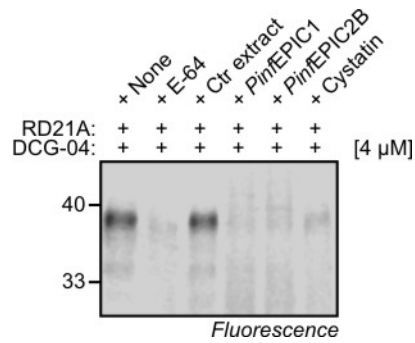

**Figure S8. *Pinf*EPICs inhibit Arabidopsis RD21.**

*Nicotiana benthamiana* leaf extracts transiently overexpressing Arabidopsis RD21 (by agroinfiltration) were preincubated (30 min) with 40  $\mu$ M E-64 or with 1.2  $\mu$ M PinfEPIC1, PinfEPIC2B (Tian et al., 2007) or chicken Cystatin (Sigma) and then labelled with 4  $\mu$ M fluorescent DCG-04 for 2 hours. Proteins were separated on protein gels and fluorescent proteins were detected using a fluorescence scanner.
